# Supplementary material for: Carbides of group IVA, VA and VIA transition metals as alternative HER and ORR catalysts and support materials
Source: Royal Society of Chemistry journal article supplement (doi:10.1039/c5ta01296a), 2015-01-01
Supplement: c5ta01296a1.pdf [file c5ta01296a1.pdf]

## Carbides of group IVA, VA and VIA transition metals as alternative HER and ORR catalysts and support materials

Yagya N Regmi, Gregory R Waetzig, Kyle D Duffee, Samantha M Schmuecker, James M Thode and Brian M Leonard\*

Department of Chemistry, University of Wyoming, Laramie, Wyoming, United States.

### Supplementary Information

**Table S1:** Eutectic salt flux composition, annealing temperatures and annealing times for the synthesis of TMCs.

| $M_xC_y$  | Molar ratio of salts  | Annealing temperature (°C) | Annealing time (hr) |
|-----------|-----------------------|----------------------------|---------------------|
| TiC       | LiCl:KCl:KF = 58:40:2 | 960                        | 5                   |
| $V_8C_7$  | LiCl:KCl:KF = 58:40:2 | 950                        | 12                  |
| $Cr_3C_2$ | LiCl:KCl:KF = 58:40:2 | 950                        | 12                  |
| ZrC       | LiCl:KCl:KF = 58:40:2 | 950                        | 12                  |
| $Nb_4C_3$ | LiCl:KCl:KF = 58:40:2 | 950                        | 12                  |
| $Mo_2C$   | LiCl:KCl:KF = 58:40:2 | 950                        | 12                  |
| HfC       | LiCl:KCl:KF = 58:40:2 | 750                        | 5                   |
| TaC       | LiCl:KCl:KF = 58:40:2 | 950                        | 12                  |
| WC        | NaF:NaCl = 7:10       | 1050                       | 36                  |

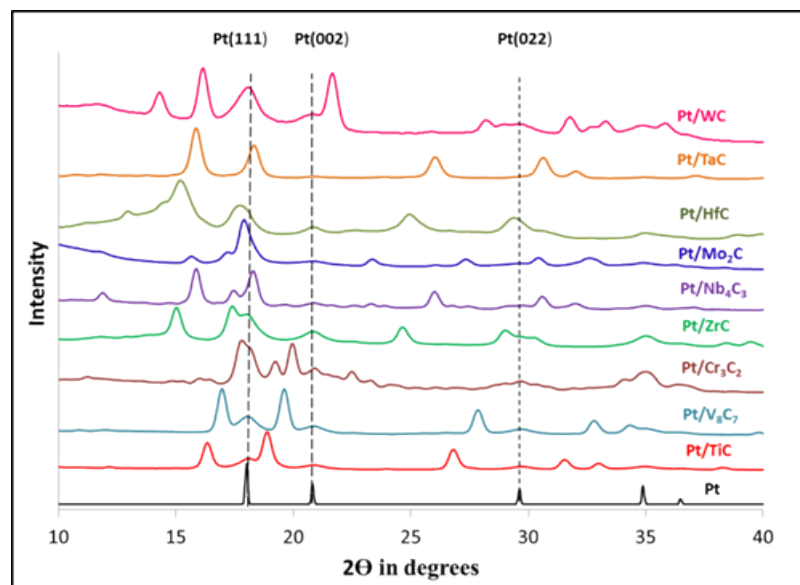

**Figure S1:** XRD patterns of Pt/TMCs. The dashed lines indicate the three major diffraction peaks for Pt (PDF # 01-087-0640).

**Table S2:** BET surface area of MCs using N<sub>2</sub> as the adsorbent gas. MWCNT is the commercially available multiwalled carbon nanotubes.

| <b>M<sub>x</sub>C<sub>y</sub></b> | <b>A (m<sup>2</sup>/g)</b> |
|-----------------------------------|----------------------------|
| TiC                               | 12.00 ± 0.21               |
| V <sub>8</sub> C <sub>7</sub>     | 7.16 ± 0.03                |
| Cr <sub>3</sub> C <sub>2</sub>    | 18.53 ± 0.16               |
| ZrC                               | 40.73 ± 0.20               |
| Nb <sub>4</sub> C <sub>3</sub>    | 10.07 ± 0.71               |
| Mo <sub>2</sub> C                 | 31.32 ± 0.12               |
| HfC                               | 28.80 ± 0.12               |
| TaC                               | 29.01 ± 0.07               |
| WC                                | 38.54 ± 2.26               |
| MWCNT                             | 234.36 ± 1.00              |

**Table S3:** Concentration of Pt determined from ICP-OES. Three most intense wavelengths were used to measure the concentration. No interference was observed in any of the three wavelengths used in the measurements.

| <b>M<sub>x</sub>C<sub>y</sub></b> | <b>PPM Pt</b> | <b>% Pt loading</b> |
|-----------------------------------|---------------|---------------------|
| TiC                               | 8.001         | 9.690               |
| V <sub>8</sub> C <sub>7</sub>     | 10.371        | 12.560              |
| Cr <sub>3</sub> C <sub>2</sub>    | 10.163        | 12.307              |
| ZrC                               | 7.015         | 8.495               |
| Nb <sub>4</sub> C <sub>3</sub>    | 7.751         | 9.387               |
| Mo <sub>2</sub> C                 | 5.956         | 7.212               |
| HfC                               | 9.601         | 11.627              |
| TaC                               | 9.119         | 11.044              |
| WC                                | 5.333         | 6.458               |

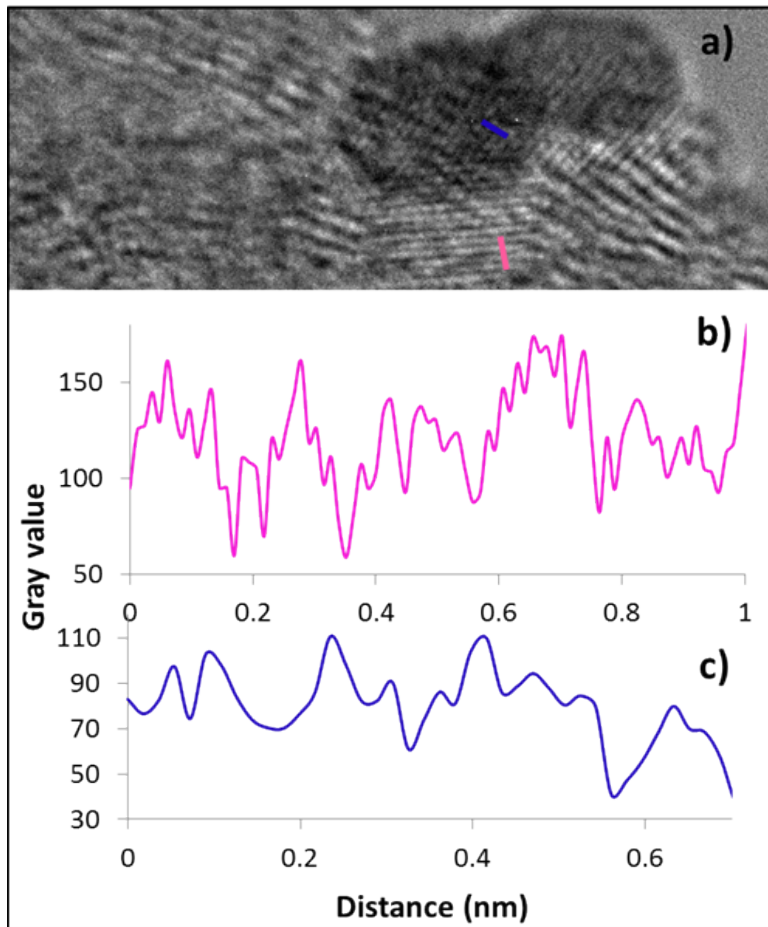

**Figure S2:** Line profile for TEM micrographs of Pt/WC. a) TEM micrograph of Pt/WC with fringe patterns for WC (light areas) and Pt (dark areas). b) Line profile of WC c) Line profile of Pt

**Table S4:** D-spacing for lattice planes of Pt, WC and multiwalled carbon nanotubes (MWCNT)

| Lattice plain | D-spacing (nm) |
|---------------|----------------|
| Pt (111)      | 0.226          |
| Pt (002)      | 0.196          |
| Pt (022)      | 0.139          |
| Pt (113)      | 0.118          |
| WC (001)      | 0.284          |
| WC (010)      | 0.252          |
| WC (011)      | 0.188          |
| WC (110)      | 0.145          |
| WC (111)      | 0.129          |
| WC (012)      | 0.124          |
| WC (021)      | 0.115          |
| WC (112)      | 0.102          |
| MWCNT (002)   | 0.335          |
| MWCNT (011)   | 0.203          |

Equation S1

$$\text{Potential (V)}_{\text{RHE}} = \text{Potential (V)}_{\text{Ag/Ag/Cl}} + 0.197 + \text{pH} \cdot 0.059$$

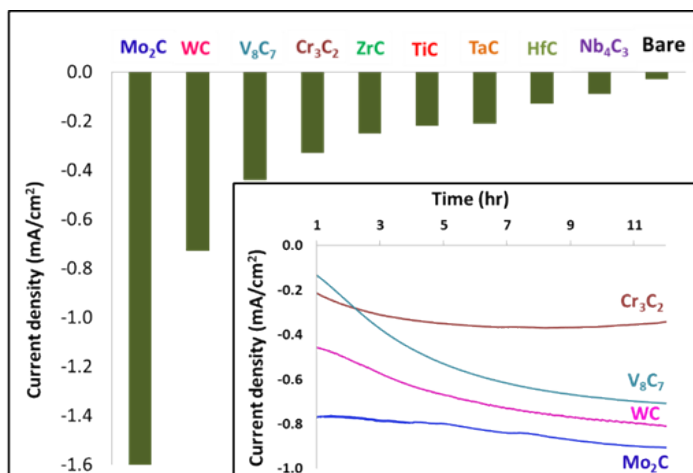

**Figure S3:** HER current density of TMCs at -344 mV vs RHE measured at 2 mV/s and 2500 rpm in 0.1 M HClO<sub>4</sub>. Bare is unmodified glassy carbon electrode. The inset represents the controlled potential electrolysis plot for Mo<sub>2</sub>C, WC, V<sub>8</sub>C<sub>7</sub> and Cr<sub>3</sub>C<sub>2</sub> recorded at -294 mV vs RHE, for 12 hours.

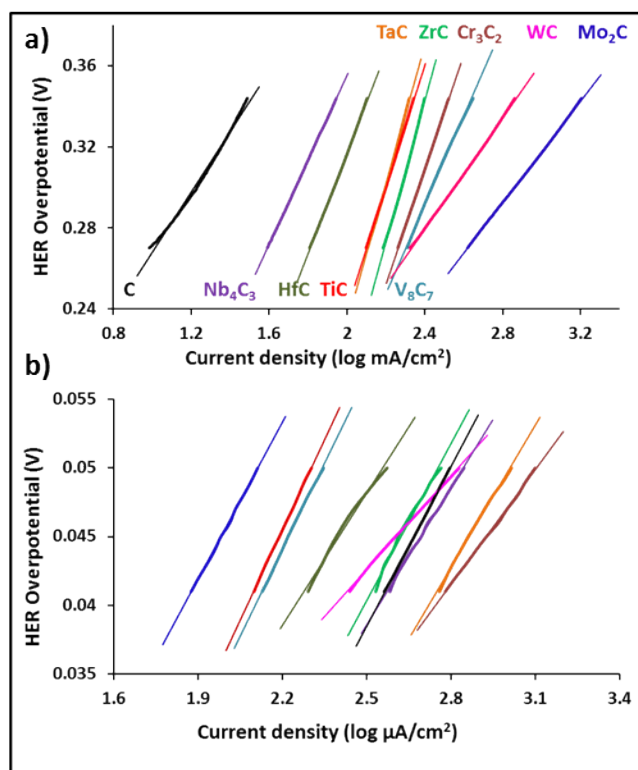

**Figure S4:** Tafel plots of HER polarization curves for a) TMCs in figure 4 and b) Pt/TMCs from figure 6. The best fit lines are included for each system. Ohmic drop correction was not applied to the polarization data.

**Table S5:** Tafel slopes and exchange current densities for TMCs and Pt/TMCs based on figure S4. Tafel slopes and exchange currents were generated by fitting the data to the Tafel equation  $\eta = b \log(j) + a$  where  $\eta$  is the overpotential,  $b$  is the tafel slope,  $j$  is the current density corresponding to the overpotentials and  $a$  is the y-intercept. The exchange current densities were calculated when  $\eta = 0$  V. Ohmic drop corrections were not applied.

|                                | carbide                         |                                               | Pt/carbide                      |                                               |
|--------------------------------|---------------------------------|-----------------------------------------------|---------------------------------|-----------------------------------------------|
|                                | Tafel slope<br><i>mV/decade</i> | Exchange current<br>$\mu\text{A}/\text{cm}^2$ | Tafel slope<br><i>mV/decade</i> | Exchange current<br>$\mu\text{A}/\text{cm}^2$ |
| Mo <sub>2</sub> C              | 124.8                           | 2.86                                          | 38.0                            | 6.27                                          |
| WC                             | 137.1                           | 2.30                                          | 22.7                            | 4.27                                          |
| TaC                            | 345.9                           | 21.32                                         | 34.7                            | 1.44                                          |
| Nb <sub>4</sub> C <sub>3</sub> | 209.4                           | 2.01                                          | 33.4                            | 22.10                                         |
| Cr <sub>3</sub> C <sub>2</sub> | 283.7                           | 20.43                                         | 27.8                            | 20.22                                         |
| C                              | NA                              | NA                                            | 38.7                            | 32.10                                         |
| ZrC                            | 350.6                           | 26.43                                         | 37.9                            | 27.25                                         |
| HfC                            | 250.0                           | 5.40                                          | 31.9                            | 9.93                                          |
| V <sub>8</sub> C <sub>7</sub>  | 218.9                           | 11.65                                         | 41.8                            | 14.00                                         |
| TiC                            | 301.4                           | 15.97                                         | 43.7                            | 14.46                                         |

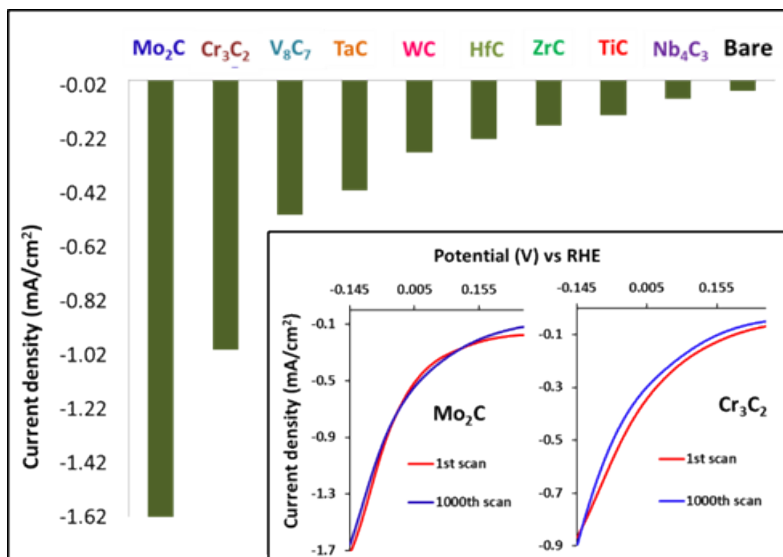

**Figure S5:** ORR current density of TMCs at -144 mV vs RHE measured at 50 mV/s and 1600 rpm in 0.1 M HClO<sub>4</sub>. Bare is unmodified glassy carbon electrode. The inset represents the LSV curves for 1<sup>st</sup> and 1000<sup>th</sup> cycles for Mo<sub>2</sub>C and Cr<sub>3</sub>C<sub>2</sub>.

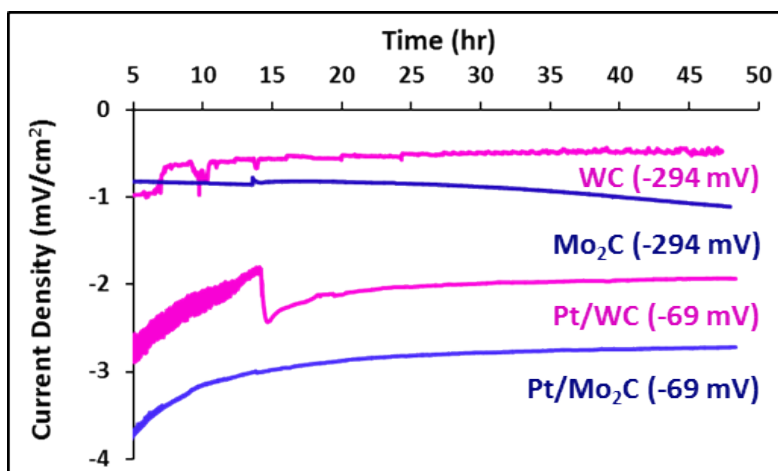

**Figure S6:** HER current densities from controlled potential indicated electrolysis at various applied potentials vs RHE for Mo<sub>2</sub>C, Pt/Mo<sub>2</sub>C, WC and Pt/WC for 48 hours at 2500 rpm in 0.1 M HClO<sub>4</sub>.

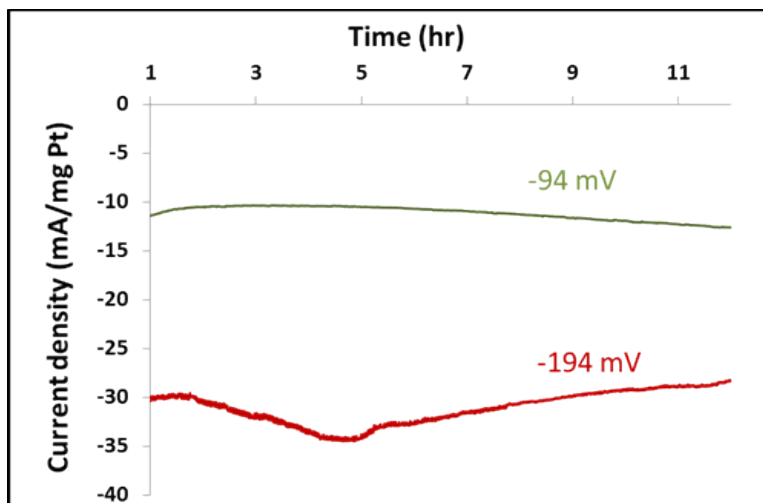

**Figure S7:** HER current normalized to Pt loading from controlled potential electrolysis at -94 and -194 mV applied potentials for Pt/TiC for 12 hours at 2500 rpm in 0.1 M HClO<sub>4</sub>.
